# Supplementary material
Source: Royal Society of Chemistry journal article supplement (doi:10.1039/d5nr05348j)
Supplement: d5nr05348j1.pdf [file d5nr05348j1.pdf]

Supplementary information

## Crossing the paths: the possible role of Co-based materials from lithium-ion battery recycling in the efficient electrocatalytic hydrogen production

Eleonora Carena,<sup>a</sup> Leire Caizán Juanarena,<sup>b</sup> Andrea Marchionni Jonathan Filippi,<sup>c</sup> Enrico Berretti,<sup>c</sup> Andrea Marrani,<sup>e</sup> Carlo Santoro,<sup>a</sup> Mohsin Muhyuddin,<sup>a</sup> and Chiara Ferrara<sup>a,d\*</sup>

<sup>a</sup> Department of Materials Science University of Milano-Bicocca, U5, Via Roberto Cozzi 55, 20125, Milan (MI), Italy.

<sup>b</sup> Departamento de Física Aplicada I, Facultad de Ciencias, Universidad de Málaga, Málaga, 29071, Spain.

<sup>c</sup> Institute of Chemistry of Organometallic Compounds (ICCOM) National Research Council (CNR), Via Madonna del Piano 10, Sesto Fiorentino, 50019, Italy.

<sup>d</sup> Department of Chemistry, "Sapienza" University of Rome, P.le Aldo Moro 5, I-00185 Rome, Italy

National Reference Center for Electrochemical Energy Storage (GISEL), Consorzio Interuniversitario Nazionale per la Scienza e Tecnologia dei Materiali (INSTM), via Giusti 9, 50121-Firenze, Italy\* Corresponding author: chiara.ferrara@unimib.it

**Table S1** – CHNS and ICP results for the elemental composition of all the samples considered in this study.

| Sample        | C / % | H / % | N / % | S / % | Co / % | Li / % | Ni / % | Mn / % |
|---------------|-------|-------|-------|-------|--------|--------|--------|--------|
| Black Mass    | 2.61  | 0.08  | 0.45  | 0.14  | 63     | 5      | -      | < 0.4  |
| Metal_Pre_300 | 69.00 | 6.12  | 3.82  | 0     | 22     | -      | -      | -      |
| Metal_Pre_400 | 53.54 | 2.78  | 3.43  | 0     | 31     | -      | -      | -      |
| Metal_Pre_500 | 13.73 | 0.76  | 1.17  | 0     | 58     | -      | -      | -      |
| Res_Cath_550  | 0.19  | 0.15  | 0     | 0.10  | 54     | 5      | -      | -      |
| Res_Cath_650  | 0.09  | 0.05  | 0     | 0.04  | 58     | 5      | -      | -      |
| Res_Cath_750  | 0.09  | 0.05  | 0     | 0.07  | 63     | 6      | -      | -      |
| Res_Cath_850  | 0.04  | 0     | 0.03  | 0.13  | 59     | 6      | -      | -      |

**Table S2** – Binding energy positions and assignment of peaks resulting from curve-fitting of the XPS spectra from the two representative samples reported in **Figure S2**.

| Sample        | Position (eV) | Assignment                        | Chemical species                                    |
|---------------|---------------|-----------------------------------|-----------------------------------------------------|
| Metal_Pre_500 | 780.9         | $2p_{3/2}^{-1}3d^8L^{-1} Co^{2+}$ | CoO                                                 |
|               | 783.0         | $2p_{3/2}^{-1}3d^9L^{-2} Co^{2+}$ | CoO                                                 |
|               | 787.4         | $2p_{3/2}^{-1}3d^7 Co^{2+}$       | CoO                                                 |
| Res_Cath_650  | 779.9         | $2p_{3/2}^{-1}3d^7L^{-1} Co^{3+}$ | LiCoO <sub>2</sub> , Co <sub>3</sub> O <sub>4</sub> |
|               | 781.2         | $2p_{3/2}^{-1}3d^8L^{-1} Co^{2+}$ | LiCoO <sub>2</sub> , Co <sub>3</sub> O <sub>4</sub> |
|               | 782.6         | $2p_{3/2}^{-1}3d^9L^{-2} Co^{2+}$ | LiCoO <sub>2</sub> , Co <sub>3</sub> O <sub>4</sub> |
|               | 785.7         | $2p_{3/2}^{-1}3d^7 Co^{2+}$       | LiCoO <sub>2</sub> , Co <sub>3</sub> O <sub>4</sub> |
|               | 789.9         | $2p_{3/2}^{-1}3d^6 Co^{3+}$       | LiCoO <sub>2</sub> , Co <sub>3</sub> O <sub>4</sub> |

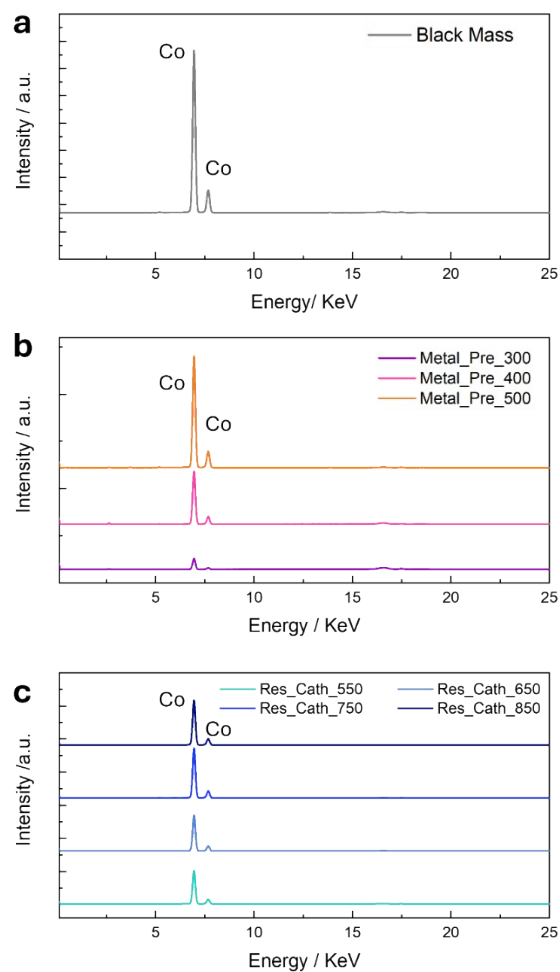

Figure S1 – XRF spectra for all the samples considered in the present study.

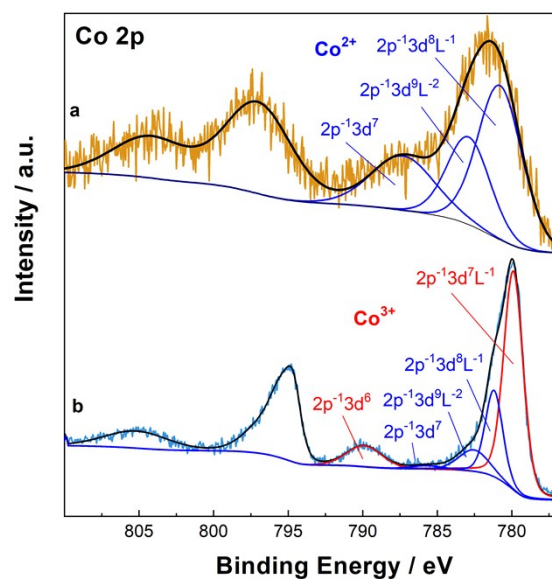

Figure S2 - Curve-fitting deconvolution of high-resolution Co 2p XPS spectra recorded with Al K $\alpha$  radiation of representative samples of the two series investigated in this work: a) Metal\_Pre\_500; b) Res\_Cath\_650.

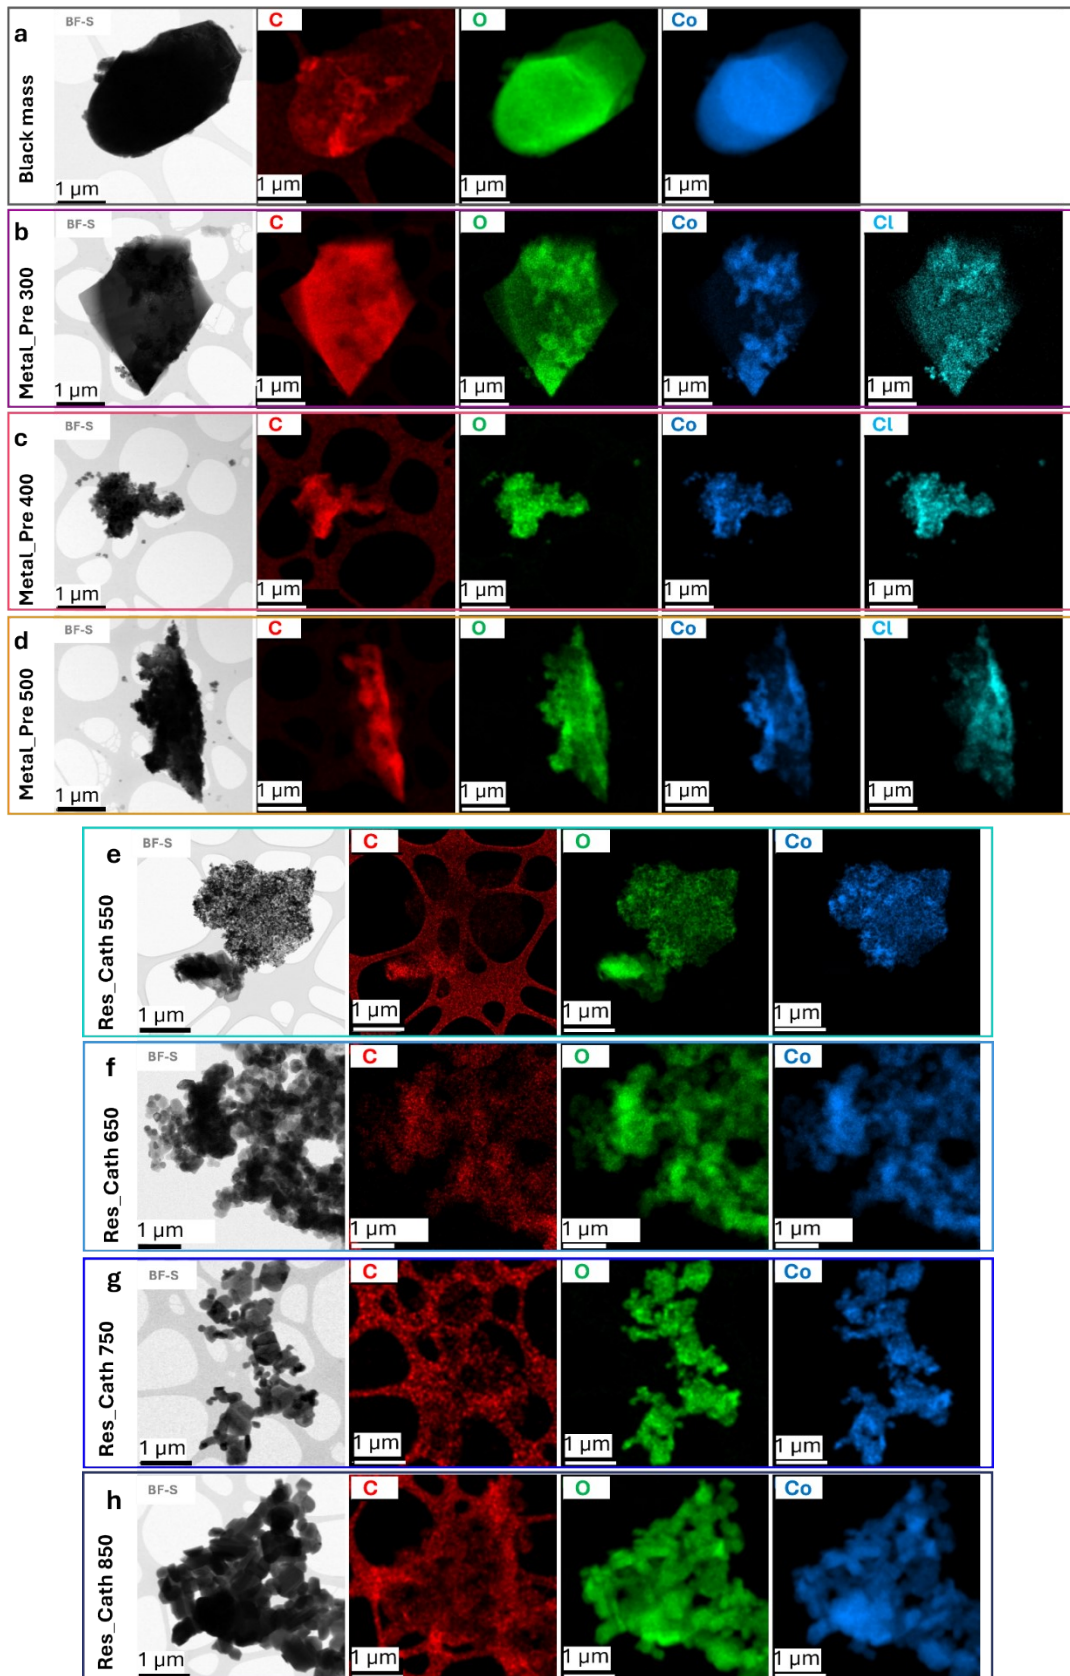

**Figure S3** – STEM images and EDX maps of samples: a) black mass, b) Metal\_pre 300, c) Metal\_Pre 400, d) Metal\_Pre 500, e) Res\_Cath 550, f) Res\_Cath 650, g) Res\_Cath 750, h) Res\_Cath 850.

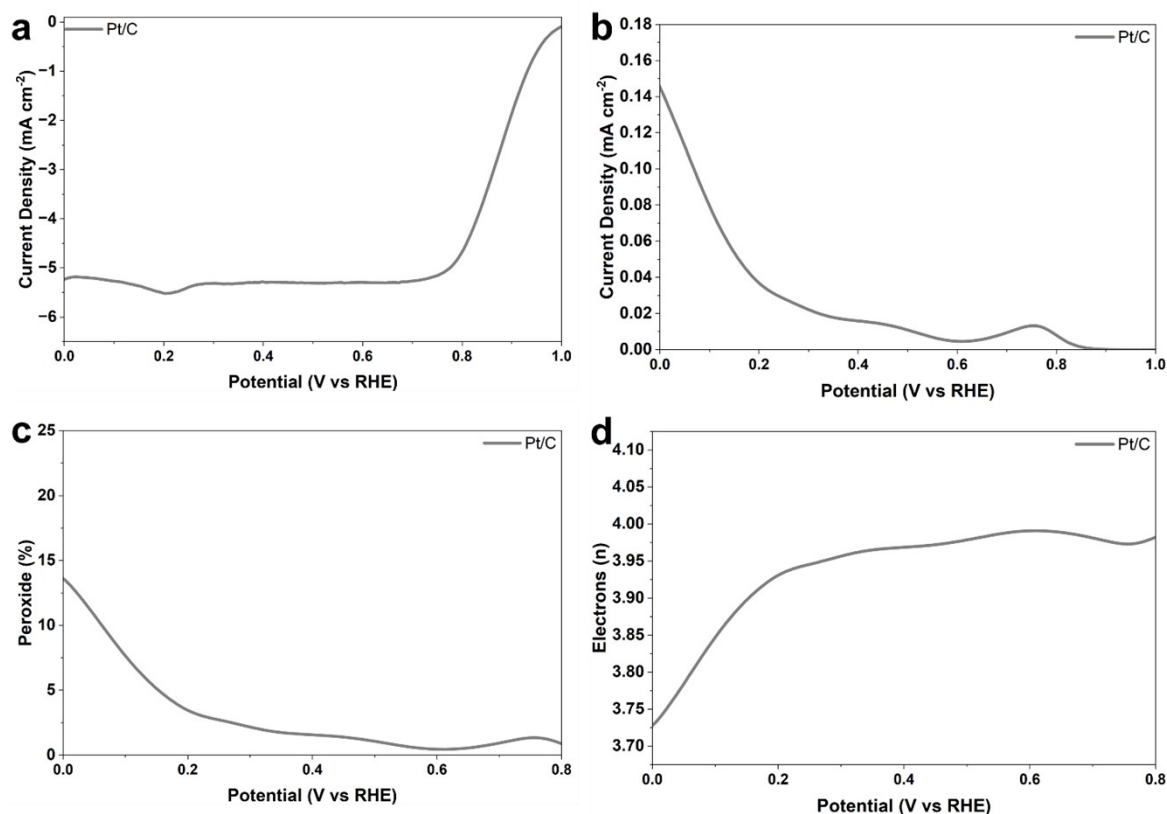

**Figure S4** – Oxygen reduction reaction performance of the samples of the benchmark Pt/C. a) Disk current density, b) ring current density, c) peroxide and d) number of electrons exchanged. The benchmark Pt/C electrocatalyst used in this study was 20 wt.% Pt supported on carbon (Pt/C), with a loading of 30  $\mu\text{g Pt cm}^{-2}$  on RRDE electrode rotating at 1600 rpm in 0.1 M KOH. (Image adapted from Mirshokraee SA, Muhyuddin M, Lorenzi R, et al. Litchi-derived platinum group metal-free electrocatalysts for oxygen reduction reaction and hydrogen evolution reaction in alkaline media. *SusMat.* 2023;3:248–262. Licensed under CC BY 4.0.)<sup>1</sup>

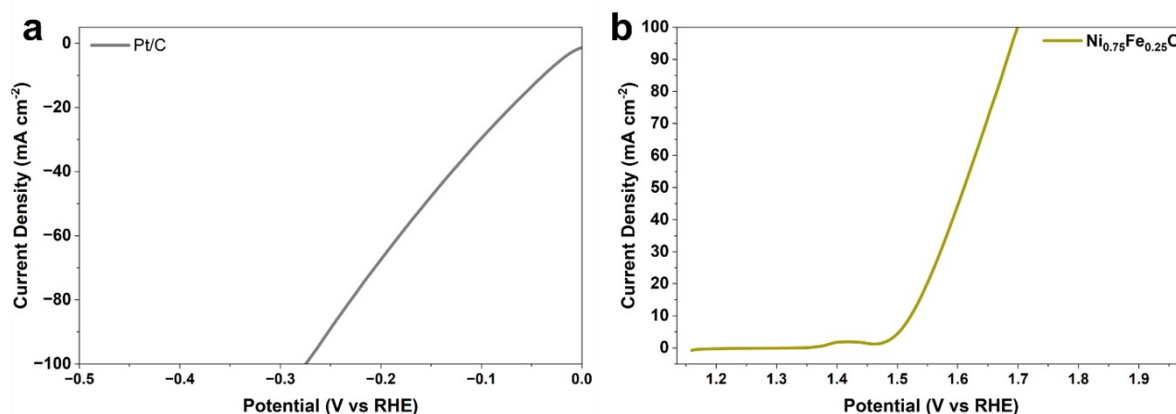

**Figure S5** – a) HER electrocatalytic activity of 20 wt.% Pt/C with loading of 30  $\mu\text{g Pt cm}^{-2}$  on RDE electrode rotating at 1600 rpm in 1 M KOH and b) OER electrocatalytic activity of state of the art NiFe oxide with 0.6 mg cm<sup>-2</sup> loading on RDE electrode rotating at 1600 rpm in 1 M KOH. The Pt/C HER is an image adapted from Mirshokraee SA, Muhyuddin M, Lorenzi R, et al. *SusMat.* 2023, **3**, 248–262. (Licensed under CC BY 4.0.)<sup>1</sup>, whereas the OER data of NiFe oxide are adapted from L. Mirizzi, M. Muhyuddin, C. Lo Vecchio, et al. *Ind. Chem. Mater.*, 2025, **3**, 485 (Licensed under CC BY 3.0.)<sup>2</sup>

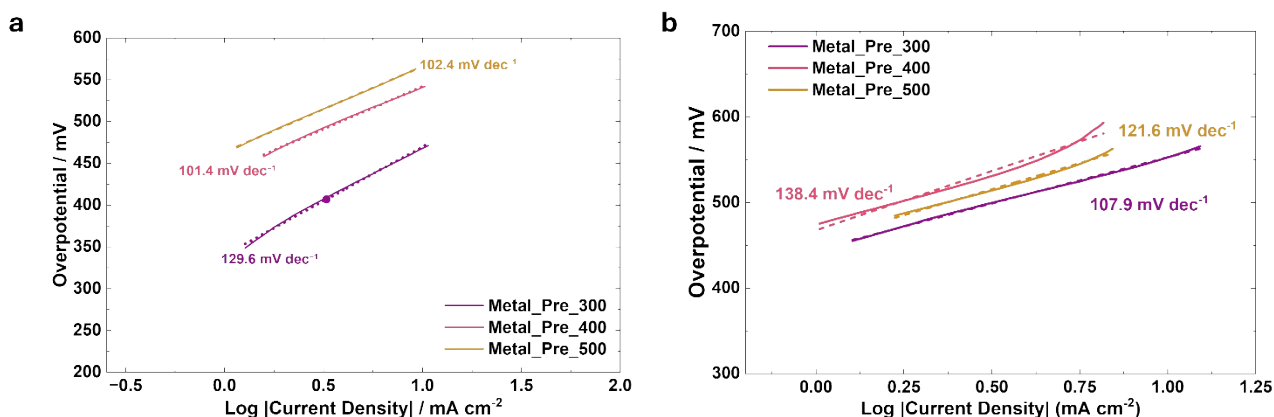

**Figure S6** – a) HER Tafel plots and b) OER plots of the samples of the Metal\_Pre\_X series supported over 50% KJB (continuous line: experimental data, dotted lines: fitted curves).

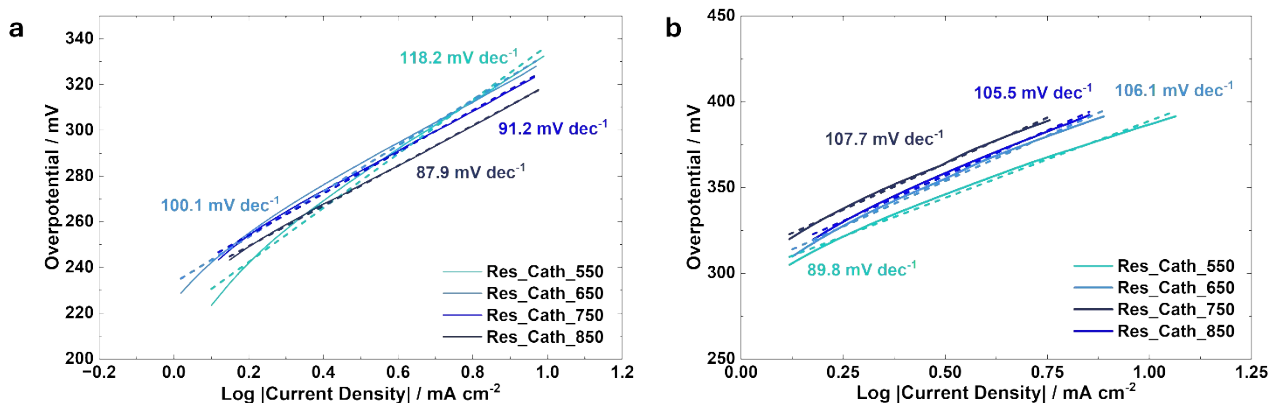

**Figure S7** – a) HER Tafel plots and b) OER plots of the samples of the Res\_Cath\_X series supported over 50% KJB (continuous line: experimental data, dotted lines: fitted curves).

**Table S3** - The comparison of HER and OER activities with other spent LIB-derived electrocatalysts reported in literature

| Sample                                  | HER Overpotential (mV vs RHE) | OER Overpotential (mV vs RHE) | Electrolyte | Reference |
|-----------------------------------------|-------------------------------|-------------------------------|-------------|-----------|
| Res_Cath_850                            | 330                           | 418                           | 1M KOH      | This work |
| CoN NFs                                 | 188                           | 282                           | 1M KOH      | 3         |
| Waste LCOd 50-50                        | 277                           | -                             | 1M KOH      | 4         |
| CP3                                     | -                             | 550                           | 1M KOH      | 5         |
| Q-LDH-0.1                               | -                             | 270                           | 1M KOH      | 6         |
| CMS-NF                                  | 118                           | 317                           | 1M KOH      | 7         |
| Spinel MnCo <sub>2</sub> O <sub>4</sub> | -                             | 400                           | 1M KOH      | 8         |
| $\beta$ -Ni(OH) <sub>2</sub>            | -                             | 264                           | 1M KOH      | 9         |

**Table S4** - The comparison of ORR activity with other spent LIB-derived electrocatalysts reported in the literature

| Sample                                | $E_{on}$<br>V vs<br>RHE | $E_{1/2}$<br>V vs<br>RHE | Peroxide<br>%   | Electrons<br>transferred<br>n | Electrolyte | Reference |
|---------------------------------------|-------------------------|--------------------------|-----------------|-------------------------------|-------------|-----------|
| Res_Cath_850                          | 0.865                   | 0.7                      | Up to ca.<br>15 | above ca. 3.7                 | 0.1 M KOH   | This Work |
| N-Co/rGO-AT                           | 0.98                    | 0.86                     | -               | Ca. 3.7                       | 0.1 M KOH   | 10        |
| ChCl.Citric<br>50:50                  | 0.85                    | 0.76                     | Up to ca.<br>20 | above ca. 3.5                 | 0.1 M KOH   | 4         |
| Co <sub>3</sub> O <sub>4</sub> /rGO-2 | 0.936                   | 0.865                    | -               | 4.03                          | 1M<br>KOH   | 11        |
| Co@NG-800                             | 0.92                    | 0.88                     | Below 12        | 3.95                          | 1M<br>KOH   | 12        |
| NC-1000                               | 0.925                   | 0.828                    | 1.59            | Ca. 4                         | 0.1 M KOH   | 13        |
| CoN NFs                               | 0.938                   | 0.819                    | Up to 5         | Ca. 4                         | 1M<br>KOH   | 3         |

## References

- 1 S. A. Mirshokraee, M. Muhyuddin, R. Lorenzi, G. Tseberlidis, C. L. Vecchio, V. Baglio, E. Berretti, A. Lavacchi and C. Santoro, *SusMat*, 2023, **3**, 248–262.
- 2 L. Mirizzi, M. Muhyuddin, C. L. Vecchio, E. Mosca, V. Baglio, I. Gatto, E. Berretti, A. Lavacchi, V. C. A. Ficca, R. Viscardi, R. Nisticò and C. Santoro, *Ind. Chem. Mater.*, 2025, **3**, 485–497.
- 3 Z. Wang, M. Li, B. Fu, W. Cao and X. Bo, *J. Colloid Interface Sci.*, 2024, **662**, 218–230.
- 4 S. A. Mirshokraee, M. Muhyuddin, R. Morina, L. Poggini, E. Berretti, M. Bellini, A. Lavacchi, C. Ferrara and C. Santoro, *J. Power Sources*, 2023, **557**, 232571.
- 5 A. Arif, M. Xu, J. Rashid, C. S. Saraj, W. Li, B. Akram and B. Hu, *Nanomaterials*, 2021, **11**, 3343.
- 6 R. Yao, J. Wu, S. Kansara, Z. Sun, H. Kang, F. Liu, K. Wang, J. Hu, X. Li, D. Wu, J.-Y. Hwang and S. Xiong, *Advanced Science*, 2025, **12**, 2501957.
- 7 A. S. Sajeevan, N. P. Dileep, S. Sunny and M. M. Shajumon, *ChemCatChem*, 2025, **17**, e00427.
- 8 S. Natarajan, S. Anantharaj, R. J. Tayade, H. C. Bajaj and S. Kundu, *Dalton Trans.*, 2017, **46**, 14382–14392.
- 9 H. Jungi, A. Karmakar, S. Kundu and J. Mitra, *J. Mater. Chem. A*, 2023, **11**, 13687–13696.
- 10 M. Kazemi, K. Liivand, M. Prato, P. Vacek, J. Walmsley, S. Dante, G. Divitini and I. Kruusenberg, *Energy Fuels*, 2024, **38**, 659–670.
- 11 K. S. Bejigo, S. Natarajan, K. Bhunia, V. Elumalai and S.-J. Kim, *J. Cleaner Prod.*, 2023, **384**, 135520.
- 12 K. Serbara Bejigo, K. Bhunia, J. Kim, C. Lee, S. Back and S.-J. Kim, *J. Energy Chem.*, 2023, **82**, 148–157.
- 13 Y. Shen, G. Zhang, R. Wang, L. Shen, Q. Li, F. Zheng, Q. Wu and Z. Ma, *ChemPlusChem*, 2022, **87**, e202200328.
